# Supplementary material for: Maternal age affects equine day 8 embryo gene expression both in trophoblast and inner cell mass
Source: PubMed Central journal article supplement (PMC9199136; doi:10.1186/s12864-022-08593-7), 2022-06-15

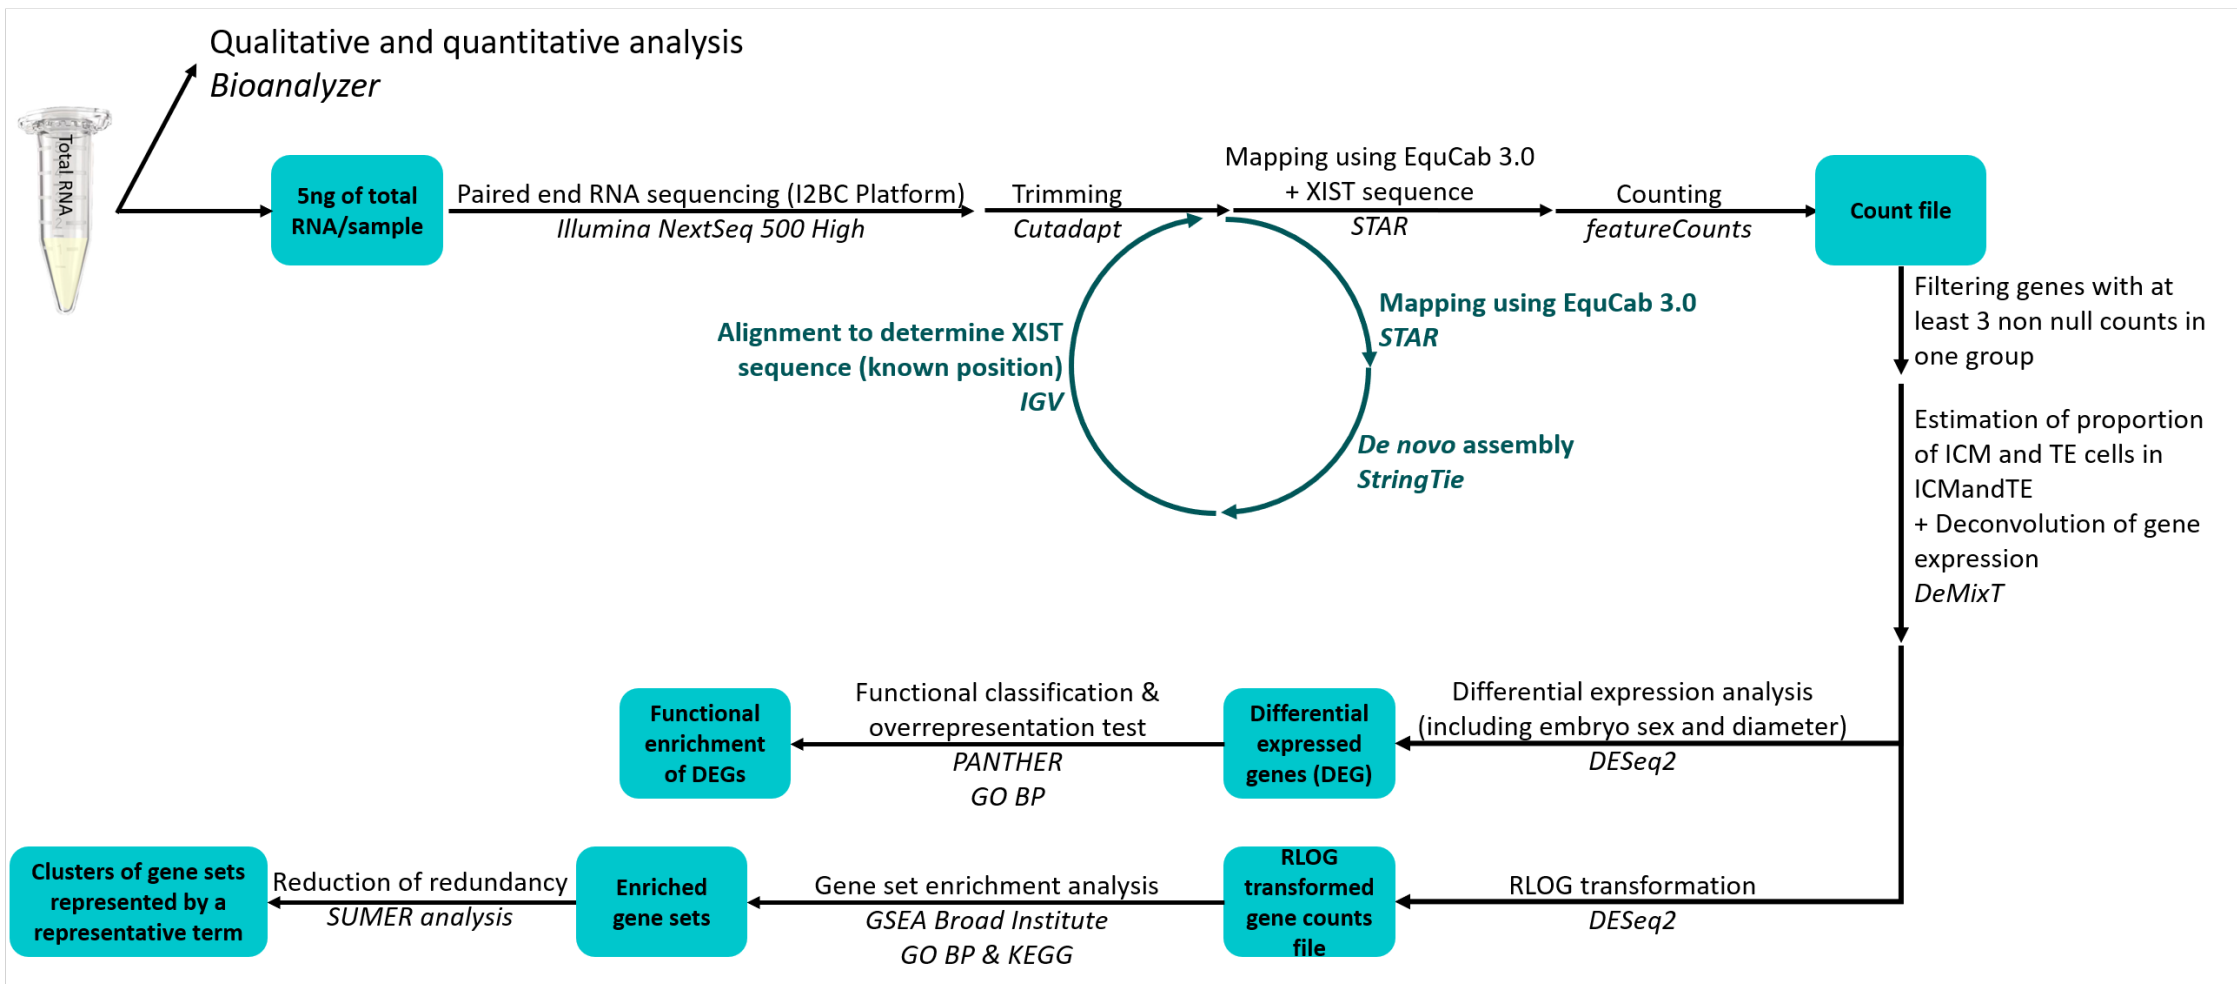

Supplement: 12864_2022_8593_MOESM2_ESM.pdf [file 12864_2022_8593_MOESM2_ESM.pdf]
